# Supplementary material for: Association between community deprivation and practising health behaviours among South Korean adults: a survey-based cross-sectional study
Source: HighWire-hosted journal article supplement (doi:10.1136/bmjopen-2020-047244), 2021-06-01
Supplement: bmjopen-2020-047244supp001_data_supplement.pdf [file bmjopen-2020-047244supp001_data_supplement.pdf]

**Materials Included:****Table S1. Subgroup analysis of not-practicing health behaviors stratified by dependent variable**

**Table S1. Subgroup analysis of not-practising health behaviors stratified by dependent variable\***

| Variables                          | Not-practicing health behaviors <sup>a</sup> |                    |                        |
|------------------------------------|----------------------------------------------|--------------------|------------------------|
|                                    | Smoking                                      | Drinking           | Not walking frequently |
|                                    | OR (95% CI)                                  | OR (95% CI)        | OR (95% CI)            |
| <b>Community deprivation index</b> |                                              |                    |                        |
| Quartile 1 (lowest)                | 1.00                                         | 1.00               | 1.00                   |
| Quartile 2                         | 1.03 (0.97 - 1.09)                           | 1.04 (0.97 - 1.12) | 1.01 (0.87 - 1.17)     |
| Quartile 3                         | 1.05 (0.99 - 1.11)                           | 1.14 (1.06 - 1.23) | 1.11 (0.96 - 1.29)     |
| Quartile 4 (highest)               | 0.96 (0.90 - 1.02)                           | 1.00 (0.92 - 1.08) | 1.25 (1.08 - 1.45)     |

\*Multilevel logistic analysis adjusted for variables including age, marital status, occupation, household income, BMI, the number of chronic diseases, perceived health status, perceived stress, and region.

<sup>a</sup>Those who were classified under the practicing health behaviors group met all of three conditions: not present smoking, not in high-risk drinking group and walking for 30 minutes over 5 days per week.
